# Supplementary material for: Evidence That Inconsistent Gene Prediction Can Mislead Analysis of Dinoflagellate Genomes
Source: PubMed Central journal article supplement — J Phycol. 2020 Feb 14;56(1):6–10. doi: 10.1111/jpy.12947 (PMC7065002; doi:10.1111/jpy.12947), 2020-02-14
Supplement: JPY-56-6-s002.pdf [file JPY-56-6-s002.pdf]

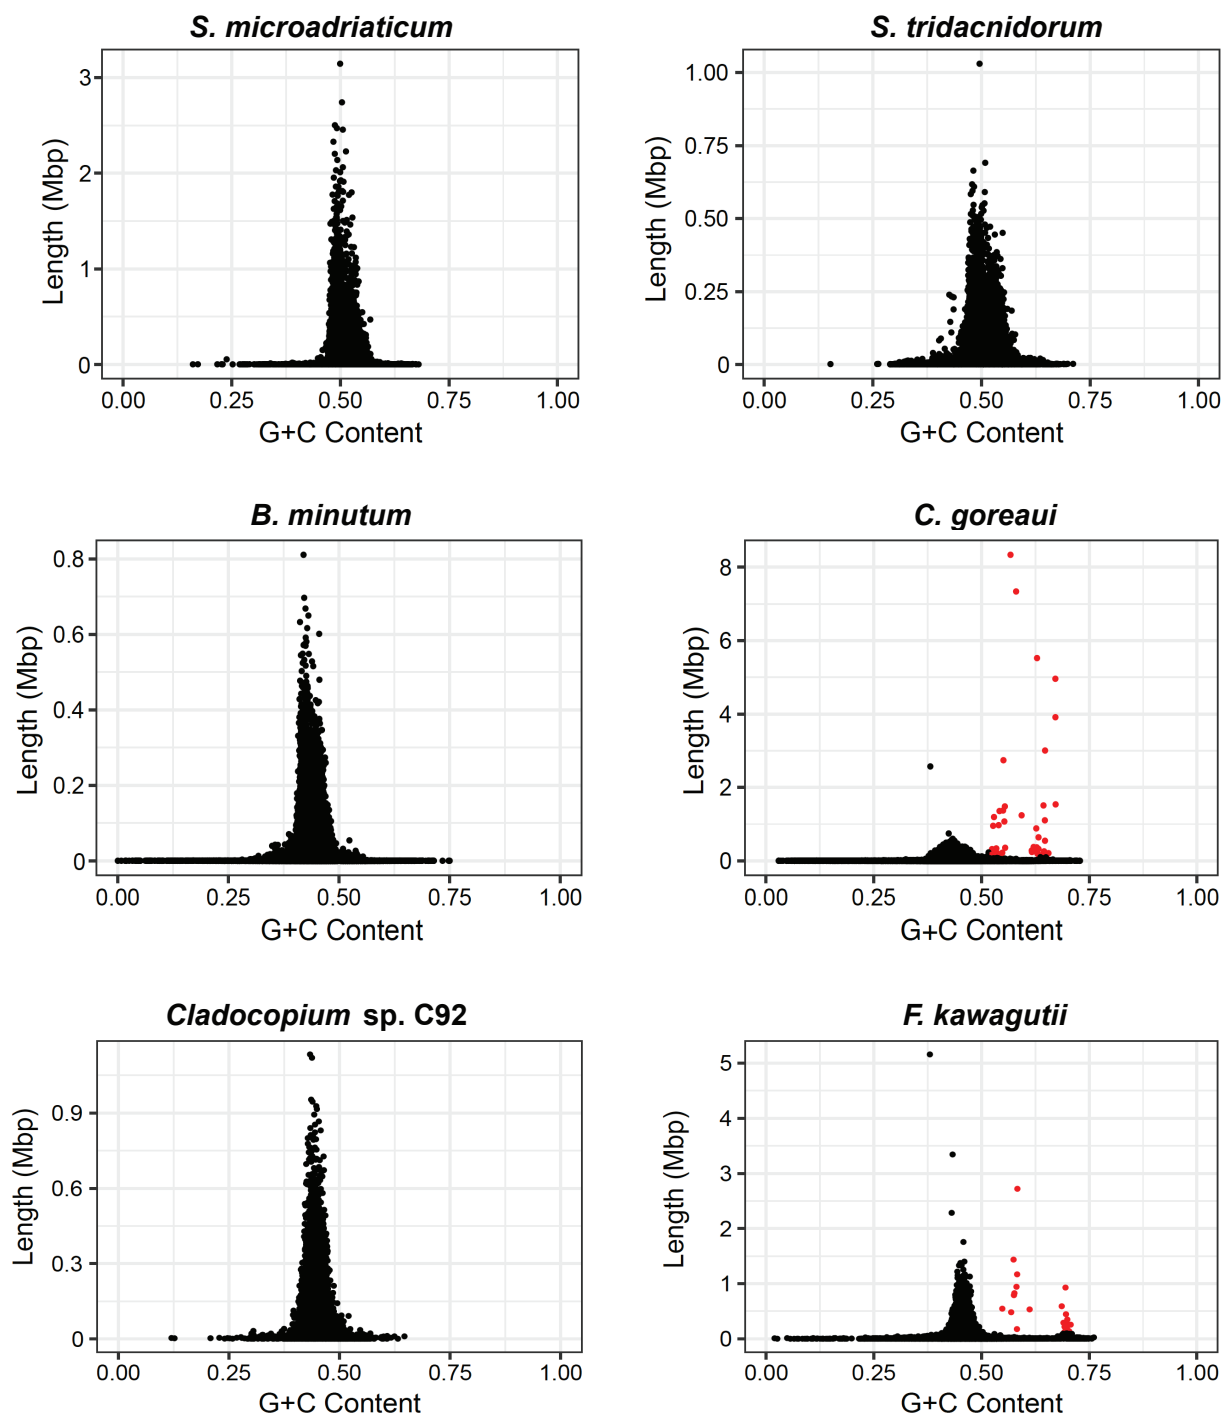

**Fig. S2.** Distribution of G+C percentage assembled genome scaffolds relative to scaffold length, shown for each of the six Symbiodiniaceae genomes analyzed in this study. Data points representing scaffolds that were identified as putative contaminants are highlighted in red.
