# Supplementary material for: Evidence That Inconsistent Gene Prediction Can Mislead Analysis of Dinoflagellate Genomes
Source: PubMed Central journal article supplement — J Phycol. 2020 Feb 14;56(1):6–10. doi: 10.1111/jpy.12947 (PMC7065002; doi:10.1111/jpy.12947), 2020-02-14
Supplement: JPY-56-6-s003.pdf [file JPY-56-6-s003.pdf]

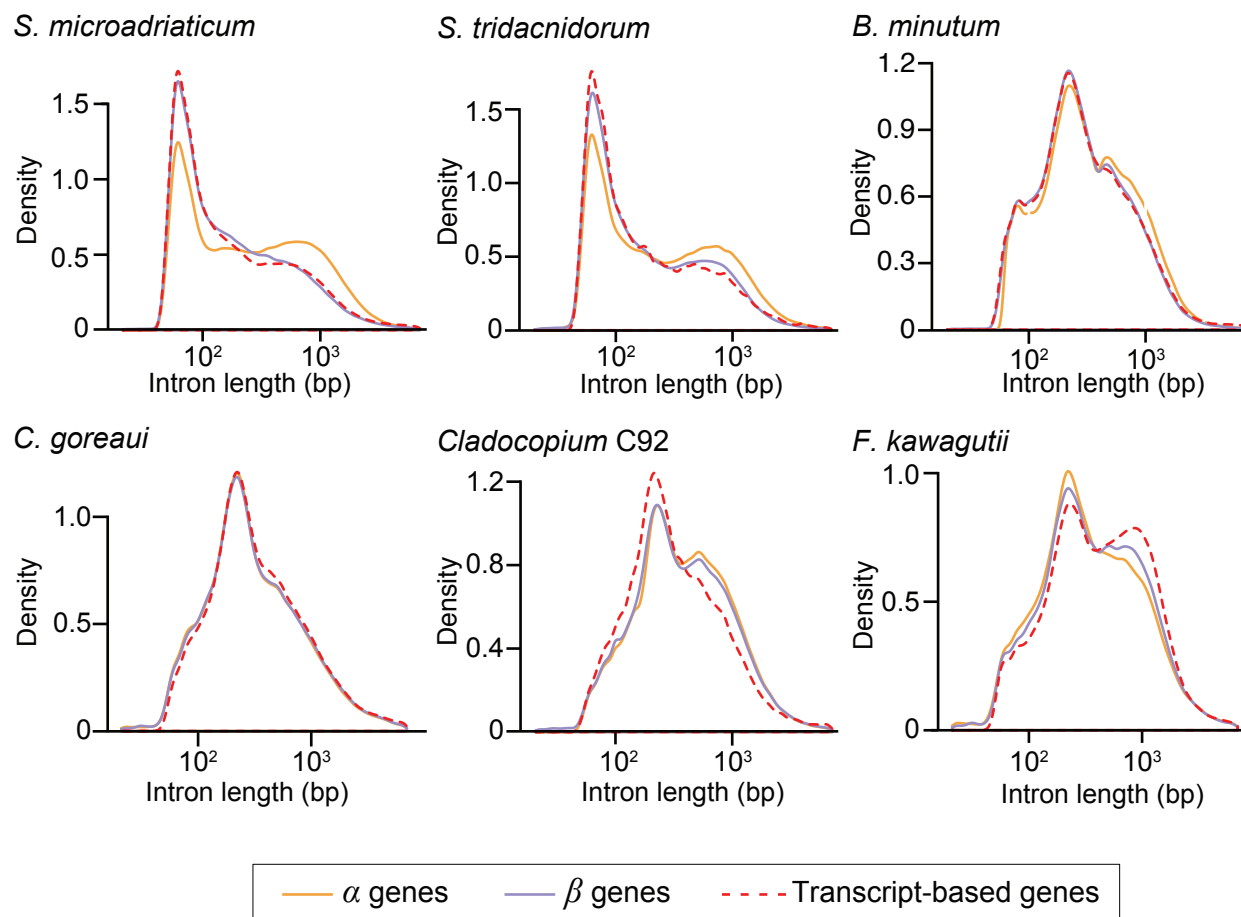

**Fig. S3.** Distribution of intron lengths in predicted genes from the six Symbiodiniaceae genomes. In each graph, the distribution of intron lengths among  $\alpha$  genes (orange line), among  $\beta$  genes (purple line), and among transcript-based genes (predicted using PASA and TransDecoder; red dashed line) are shown. The transcript-based genes (see Appendix S1) were considered as a proxy for true gene structure.
