# Supplementary material for: Evidence That Inconsistent Gene Prediction Can Mislead Analysis of Dinoflagellate Genomes
Source: PubMed Central journal article supplement — J Phycol. 2020 Feb 14;56(1):6–10. doi: 10.1111/jpy.12947 (PMC7065002; doi:10.1111/jpy.12947), 2020-02-14
Supplement: JPY-56-6-s004.pdf [file JPY-56-6-s004.pdf]

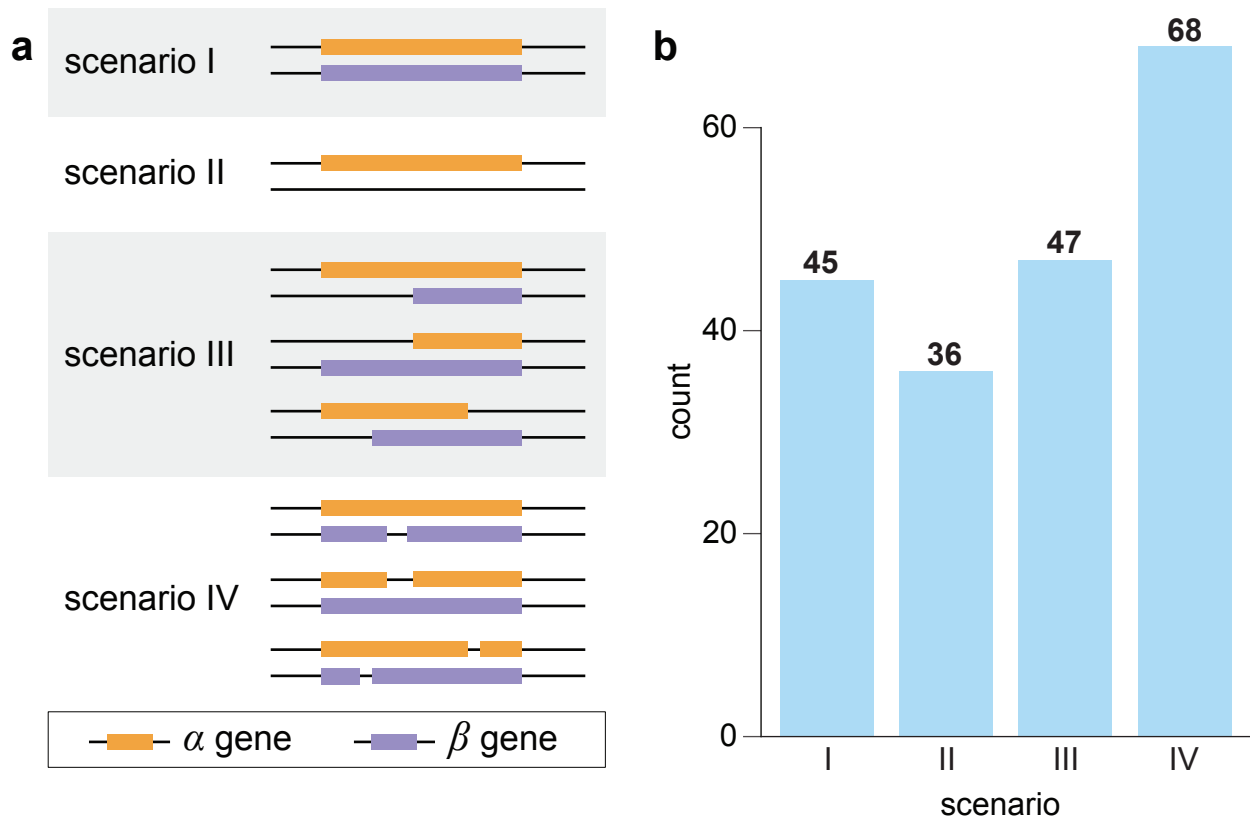

**Fig. S4.** Structural differences between  $\alpha$  and  $\beta$  genes. (a) Four scenarios into which the structural differences are broadly categorized. (b) Among collinear syntenic blocks shared by *S. tridacnidorum* and *Cladocopium* C92, the number of implicated  $\alpha$  genes that fall into each of the four scenarios (relative to the corresponding  $\beta$  genes) is shown.
