# Supplementary material for: Evidence That Inconsistent Gene Prediction Can Mislead Analysis of Dinoflagellate Genomes
Source: PubMed Central journal article supplement — J Phycol. 2020 Feb 14;56(1):6–10. doi: 10.1111/jpy.12947 (PMC7065002; doi:10.1111/jpy.12947), 2020-02-14
Supplement: JPY-56-6-s005.pdf [file JPY-56-6-s005.pdf]

**Table S1.** Metrics of predicted genes in genomes of Symbiodiniaceae analyzed in this study.

| Metric                                       | <i>B. minutum</i> |         | <i>Cladocopium C92</i> |         | <i>S. microadriaticum</i> |         | <i>S. tridacnidorum</i> |         | <i>C. goreau</i> |         | <i>F. kawagutii</i> |         |      |
|----------------------------------------------|-------------------|---------|------------------------|---------|---------------------------|---------|-------------------------|---------|------------------|---------|---------------------|---------|------|
|                                              | $\alpha$          | $\beta$ | $\alpha$               | $\beta$ | $\alpha$                  | $\beta$ | $\alpha$                | $\beta$ | $\alpha$         | $\beta$ | $\alpha$            | $\beta$ |      |
| <b>Number of genes</b>                       | 41920             | 32803   | 65832                  | 33421   | 49012                     | 29728   | 69018                   | 25808   | 29299            | 39006   | 25109               | 31520   |      |
| <b>Average gene length (bp)</b>              | 11962             | 10069   | 8193                   | 13207   | 12918                     | 9281    | 8835                    | 6467    | 7749             | 8428    | 6658                | 8836    |      |
| <b>Average CDS length (bp)</b>               | 2318              | 1930    | 1870                   | 2201    | 2392                      | 2218    | 2093                    | 1425    | 1451             | 1625    | 1664                | 1838    |      |
| <b>Transcript support (%)</b>                | 91.5              | 89.4    | 61.9                   | 78.4    | 76.5                      | 79.2    | 66.9                    | 82.6    | 81.7             | 76.5    | 67.7                | 69.0    |      |
| <b>Genes with introns (%)</b>                | 95.4              | 93.7    | 80.4                   | 97.6    | 98.2                      | 95.7    | 83.1                    | 88.2    | 93.9             | 95.9    | 94.4                | 95.9    |      |
| <b>Number of exons per gene</b>              | 23.5              | 19.0    | 16.0                   | 18.6    | 21.9                      | 19.2    | 22.7                    | 12.9    | 11.5             | 12.4    | 8.9                 | 11.6    |      |
| <b>Average exon length (bp)</b>              | 98.6              | 101.4   | 117.0                  | 118.1   | 109.3                     | 115.4   | 92.0                    | 110.3   | 125.9            | 130.4   | 185.4               | 158.1   |      |
| <b>Number of introns per gene</b>            | 22.4              | 18.0    | 14.8                   | 17.6    | 20.9                      | 18.2    | 21.5                    | 11.9    | 10.5             | 11.4    | 7.9                 | 10.6    |      |
| <b>Average intron length (bp)</b>            | 516.8             | 451.3   | 607.6                  | 623.8   | 504.6                     | 387.9   | 509.7                   | 423.1   | 598.7            | 593.5   | 626.3               | 658.4   |      |
| <b>Splice donor motif (%)</b>                | <b>GT</b>         | 48.2    | 43.9                   | 47.0    | 41.6                      | 26.0    | 26.0                    | 33.8    | 24.6             | 36.1    | 35.7                | 44.5    | 39.5 |
|                                              | <b>GC</b>         | 36.6    | 37.9                   | 41.4    | 41.4                      | 52.1    | 54.1                    | 55.5    | 57.2             | 43.1    | 43.3                | 36.0    | 39.6 |
|                                              | <b>GA</b>         | 15.2    | 18.2                   | 11.7    | 17.0                      | 21.8    | 19.9                    | 10.7    | 18.2             | 20.6    | 20.8                | 19.4    | 20.7 |
| <b>Splice acceptor with AGG motif (%)</b>    | 95.6              | 96.4    | 95.1                   | 95.2    | 96.2                      | 96.4    | 95.4                    | 97.0    | 96.3             | 96.3    | 94.7                | 95.3    |      |
| <b>Number of intergenic regions</b>          | 32429             | 25383   | 58946                  | 28504   | 42232                     | 26713   | 55407                   | 18677   | 17340            | 24243   | 20245               | 26276   |      |
| <b>Average intergenic region length (bp)</b> | 1993              | 5984    | 2062                   | 6337    | 3627                      | 15110   | 1808                    | 13545   | 12616            | 9539    | 24249               | 18051   |      |
